# Supplementary material for: Unveiling metabolic integration in psyllids and their nutritional endosymbionts through comparative transcriptomics analysis
Source: iScience. 2023 Sep 15;26(10):107930. doi: 10.1016/j.isci.2023.107930 (PMC10558732; doi:10.1016/j.isci.2023.107930)
Supplement: Document S1. Figures S1–S3 and Table S1 [file mmc1.pdf]

**Supplemental information**

**Unveiling metabolic integration in psyllids  
and their nutritional endosymbionts  
through comparative transcriptomics analysis**

**Younghwan Kwak and Allison K. Hansen**

### **This supplemental file includes**

Supplemental Figures 1 to 3

Supplemental Table 1

### **Other supplemental material for this manuscript includes the following:**

Supplemental Table 2-11 (provided in separate excel file)

### **Supplemental Figures**

**Supplemental Figure 1.** Principal component analysis (PCA) plots of gene expression count data of *D. citri* and *B. cockerelli*, related to Bioinformatic analysis in STAR Methods.

**Supplemental Figure 2.** Inter-species ortholog comparison of top 67 one-to-one orthologs, related to Figure 1.

**Supplemental Figure 3.** Phylogenetic analysis of 16S rRNA methylation gene (*rsmJ*), related to Figure 1 and Table 2.

### **Supplemental Tables**

**Supplemental Table 1.** Total RNA-Seq reads sequenced, quality trimmed, and successfully mapped as pairs for each bacteriome and body tissue, related to Bioinformatic analysis in STAR Methods.

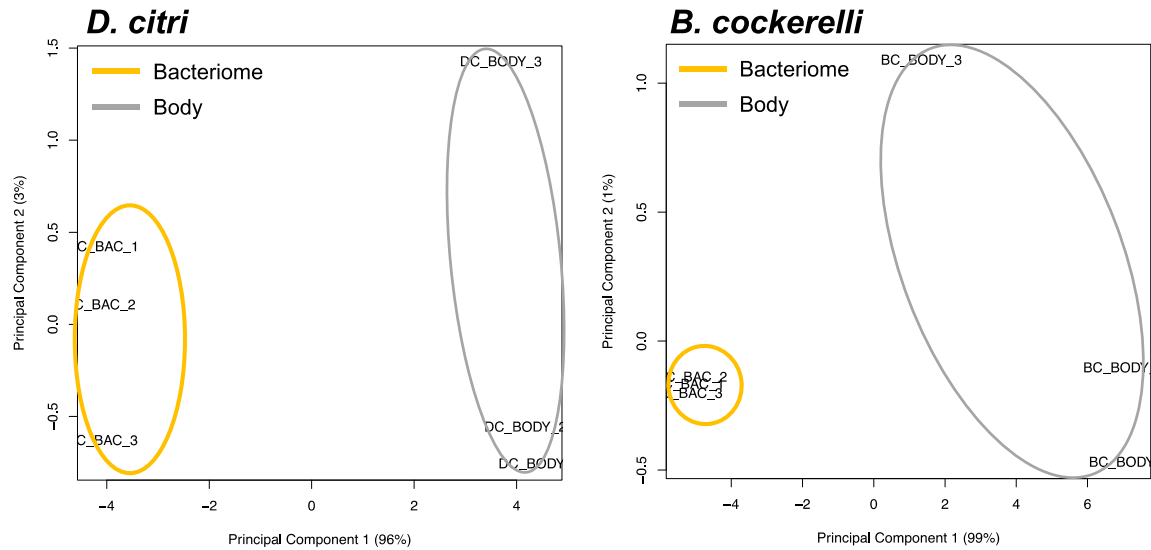

**Supplemental Figure 1.** Principal component analysis (PCA) plots of gene expression count data of *D. citri* (left) and *B. cockerelli* (right), related to Bioinformatic analysis in STAR Methods. Two tissue types are color-coded as indicated in inset legends. The variance of principle components 1 and 2 are shown in axis labels where most of the variation among samples are explained on the X-axis.

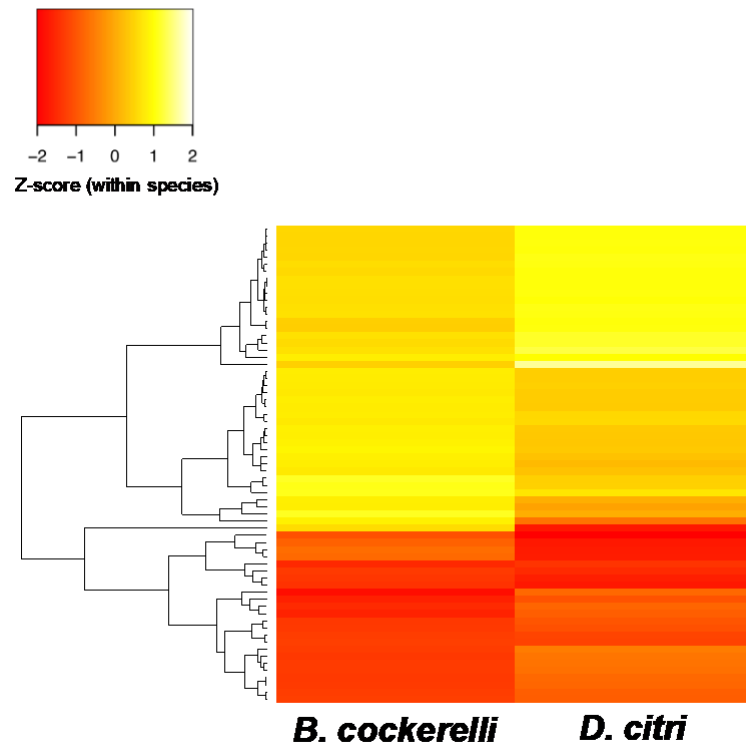

**Supplemental Figure 2.** Inter-species ortholog comparison of top 67 one-to-one orthologs with the greatest variance in standardized Log fold-change expression of bacteriomes compared to body tissues in *B. cockerelli* and *D. citri*, related to Figure 1. Each row represents a shared one-to-one ortholog between *B. cockerelli* and *D. citri*. Legend color indicates Z-score range, which was calculated within species based on Log Fold change of bacteriome relative to body; positive Z-scores indicate genes up-regulated in bacteriomes compared to body and negative scores indicate genes down-regulated in bacteriomes compared to body. See Supplemental Table 10 for detail on each one-to-one ortholog, its annotations, and fold change for each species.

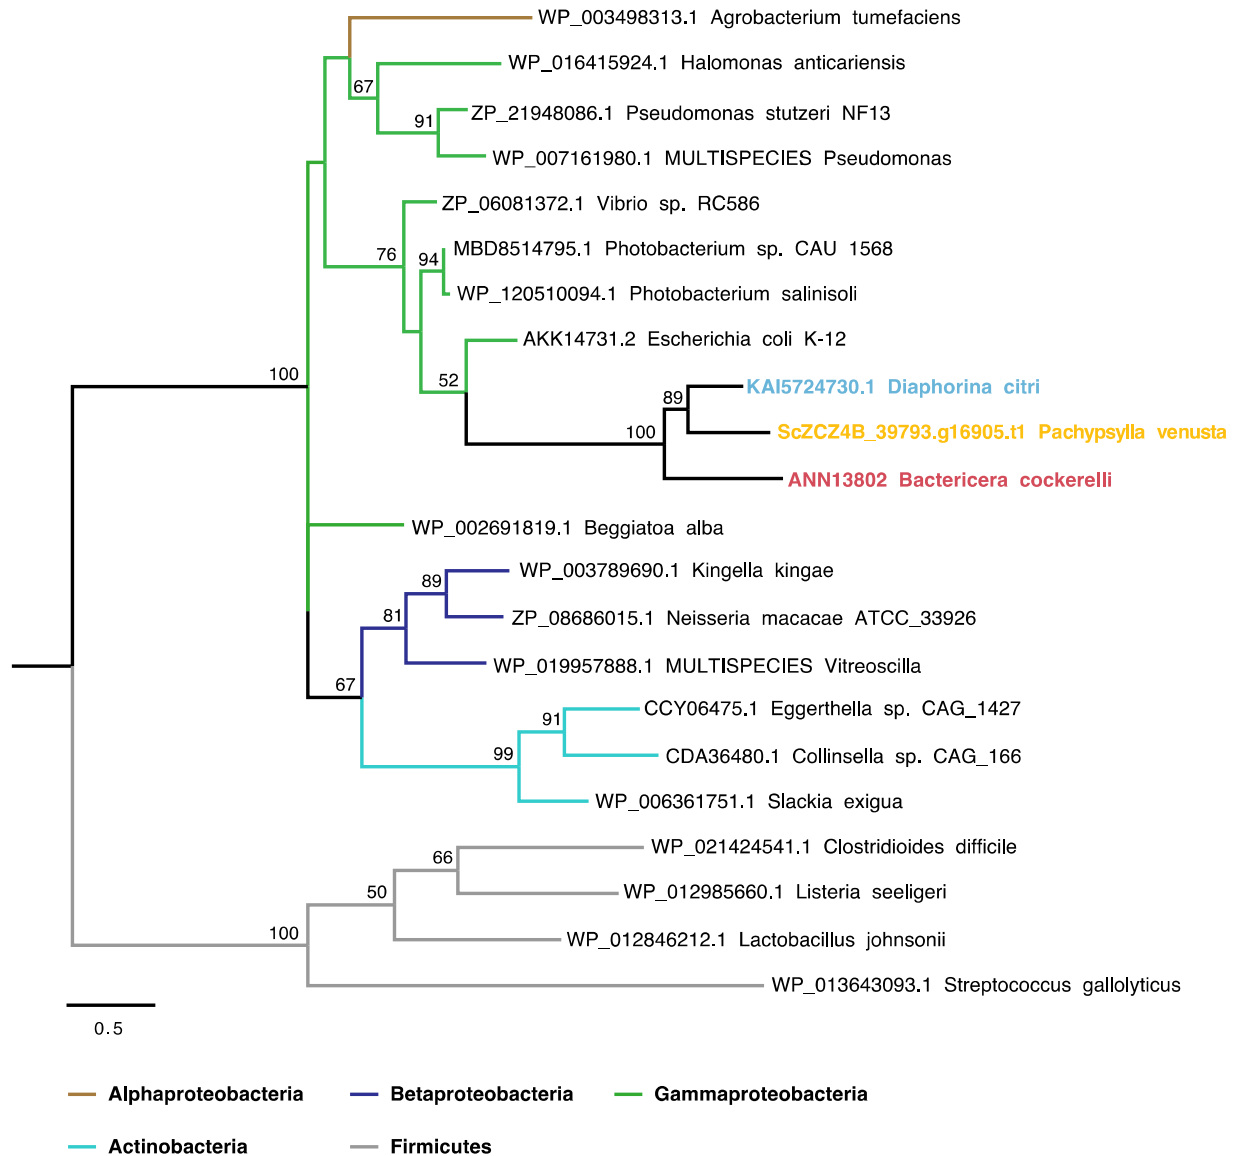

**Supplemental Figure 3.** Phylogenetic analysis of 16S rRNA methylation gene (*rsmJ*), related to Figure 1 and Table 2. The branch labels in bold indicate psyllid genes with their gene IDs. Branches are colored according to their bacterial classification. Only branch support at 50% or above is shown. The tree was rooted with the outgroup Firmicutes.

| RNA-Seq samples             | Total reads | Total reads<br>after<br>trimming | Paired reads | Unpaired<br>reads | Overall<br>alignment<br>rate |
|-----------------------------|-------------|----------------------------------|--------------|-------------------|------------------------------|
| <b><i>D. citri</i></b>      |             |                                  |              |                   |                              |
| DC1 bacteriome              | 22,896,867  | 22,845,698                       | 17,972,453   | 4,873,245         | 75.08%                       |
| DC1 Body Cells              | 25,122,905  | 25,064,597                       | 19,591,642   | 5,472,955         | 90.46%                       |
| DC2 bacteriome              | 24,247,574  | 24,198,848                       | 18,946,200   | 5,252,648         | 75.67%                       |
| DC2 Body Cells              | 23,142,913  | 23,096,306                       | 18,207,315   | 4,888,991         | 87.60%                       |
| DC3 bacteriome              | 26,870,276  | 26,820,659                       | 20,820,494   | 6,000,165         | 74.62%                       |
| DC3 Body Cells              | 25,217,218  | 25,167,628                       | 19,609,977   | 5,557,651         | 90.28%                       |
| <b><i>B. cockerelli</i></b> |             |                                  |              |                   |                              |
| BC1 bacteriome              | 23,382,333  | 23,330,084                       | 18,164,402   | 5,165,682         | 81.08%                       |
| BC1 Body Cells              | 26,044,014  | 25,994,878                       | 20,443,187   | 5,551,691         | 76.71%                       |
| BC2 bacteriome              | 27,205,923  | 27,154,811                       | 21,112,520   | 6,042,291         | 80.32%                       |
| BC2 Body Cells              | 26,886,380  | 26,832,108                       | 21,351,764   | 5,480,344         | 76.96%                       |
| BC3 bacteriome              | 28,671,247  | 28,612,318                       | 22,615,603   | 5,996,715         | 80.56%                       |
| BC3 Body Cells              | 31,033,239  | 30,971,386                       | 24,435,597   | 6,535,789         | 76.37%                       |

**Supplemental Table 1.** Total RNA-Seq reads sequenced, quality trimmed, and successfully mapped as pairs for each bacteriome and body tissue, related to Bioinformatic analysis in STAR Methods.
